# Supplementary material for: Observation of coupling between zero- and two-dimensional semiconductor systems based on anomalous diamagnetic effects
Source: Springer Nature journal article supplement (doi:10.1007/s12274-015-0910-z), 2015-12-04
Supplement: 12274_2015_910_MOESM1_ESM.pdf [file 12274_2015_910_MOESM1_ESM.pdf]

## Electronic Supplementary Material

# Observation of coupling between zero- and two-dimensional semiconductor systems based on anomalous diamagnetic effects

Shuo Cao<sup>1,§</sup>, Jing Tang<sup>1,§</sup>, Yue Sun<sup>1</sup>, Kai Peng<sup>1</sup>, Yunan Gao<sup>1</sup>, Yanhui Zhao<sup>1</sup>, Chenjiang Qian<sup>1</sup>, Sibai Sun<sup>1</sup>, Hassan Ali<sup>1</sup>, Yuting Shao<sup>1</sup>, Shiyao Wu<sup>1</sup>, Feilong Song<sup>1</sup>, David A. Williams<sup>2</sup>, Weidong Sheng<sup>3</sup>, Kuijuan Jin<sup>1,4</sup> (✉), and Xiulai Xu<sup>1</sup> (✉)

<sup>1</sup> Beijing National Laboratory for Condensed Matter Physics, Institute of Physics, Chinese Academy of Sciences, Beijing 100190, China

<sup>2</sup> Hitachi Cambridge Laboratory, Cavendish Laboratory, Cambridge CB3 0HE, UK

<sup>3</sup> Department of Physics, Fudan University, Shanghai 200433, China

<sup>4</sup> Collaborative Innovation Center of Quantum Matter, Beijing 100084, China

<sup>§</sup> These authors contributed equally to this work.

Supporting information to DOI 10.1007/s12274-015-0910-z

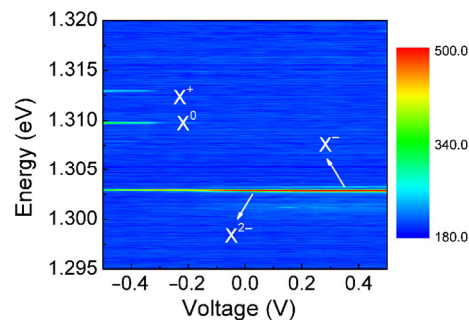

**Figure S1** Contour plot of photoluminescence (PL) spectra of a single quantum dot as a function of bias voltage with a pumping power of  $7.11 \mu\text{W}$ . Singly positively charged exciton ( $X^+$ ), neutral exciton ( $X^0$ ), singly negatively charged exciton ( $X^-$ ), and doubly negatively charged exciton ( $X^{2-}$ ) are clearly observed, as marked. The energy separations between  $X^+$  ( $X^-$ ) and  $X^0$  are about 3–7 meV, which is due to Coulomb interaction in the quantum dot. However, the separation between  $X^{2-}$  and  $X^-$  is much smaller because the third electron of  $X^{2-}$  occupies the p-shell, resulting in a smaller Coulomb interaction [S1].

Address correspondence to Xiulai Xu, [xlxu@iphy.ac.cn](mailto:xlxu@iphy.ac.cn); Kuijuan Jin, [kjjin@iphy.ac.cn](mailto:kjjin@iphy.ac.cn)

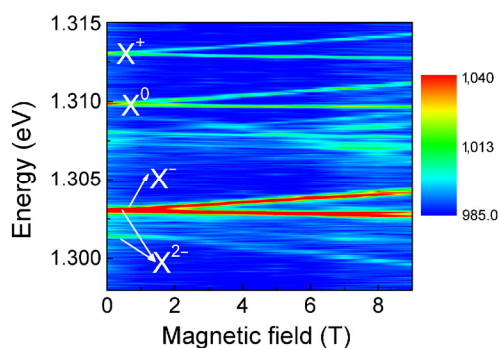

**Figure S2** Zeeman splitting and diamagnetic shift of singly positively charged exciton ( $X^+$ ), neutral exciton ( $X^0$ ), singly negatively charged exciton ( $X^-$ ), and doubly negatively charged exciton ( $X^{2-}$ ). The spectra were collected with a pumping power of  $5.93 \mu\text{W}$  with a bias voltage at  $-0.5 \text{ V}$ . The  $g$  factors are similar for all peaks in a range of 2 to 3. Peaks of  $X^+$ ,  $X^0$ ,  $X^-$ , and high energy branch of  $X^{2-}$  show a positive diamagnetic shift with values around  $6\text{--}7 \mu\text{eV/T}^2$ . The singlet branch of  $X^{2-}$  at low energy side shows a negative diamagnetic shift as reported before [S2].

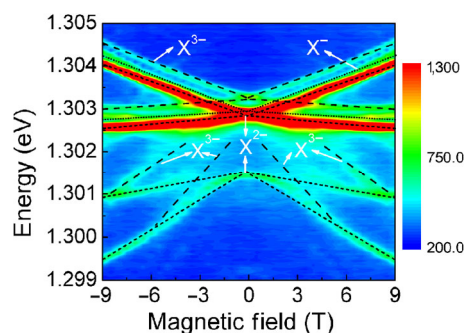

**Figure S3** Enlarged contour plot of negatively charged excitons ( $X^-$ ,  $X^{2-}$ ,  $X^{3-}$ ) as a function of an applied magnetic field with a pumping power at  $7.11 \mu\text{W}$ . Anticrossings between  $X^{3-}$  and continuum states of wetting layer are observed, which are similar to what has been reported before [S2, S3].

## References

- [S1] Tang, J.; Cao, S.; Gao, Y.; Sun, Y.; Geng, W. D.; Williams, D. A.; Jin, K. J.; Xu, X. L. Charge state control in single InAs/GaAs quantum dots by external electric and magnetic fields. *Appl. Phys. Lett.* **2014**, *105*, 041109.
- [S2] Karrai, K.; Warburton, R. J.; Schulhauser, C.; Högele, A.; Urbaszek, B.; McGhee, E. J.; Govorov, A. O.; Garcia, J. M.; Gerardot, B. D.; Petroff, P. M. Hybridization of electronic states in quantum dots through photon emission. *Nature* **2004**, *427*, 135–138.
- [S3] Van Hattem, B.; Corfdir, P.; Brereton, P.; Pearce, P.; Graham, A. M.; Stanley, M. J.; Hugues, M.; Hopkinson, M.; Phillips, R. T. From the artificial atom to the Kondo–Anderson model: Orientation-dependent magnetophotoluminescence of charged excitons in InAs quantum dots. *Phys. Rev. B* **2013**, *87*, 205308.
